# Supplementary material for: Heterogeneity and clonality of kidney-infiltrating T cells in murine lupus nephritis
Source: PubMed Central journal article supplement (PMC9089785; doi:10.1172/jci.insight.156048), 2022-04-22
Supplement: jciinsight-7-156048-s110.pdf [file jciinsight-7-156048-s110.pdf]

## Supplemental Data:

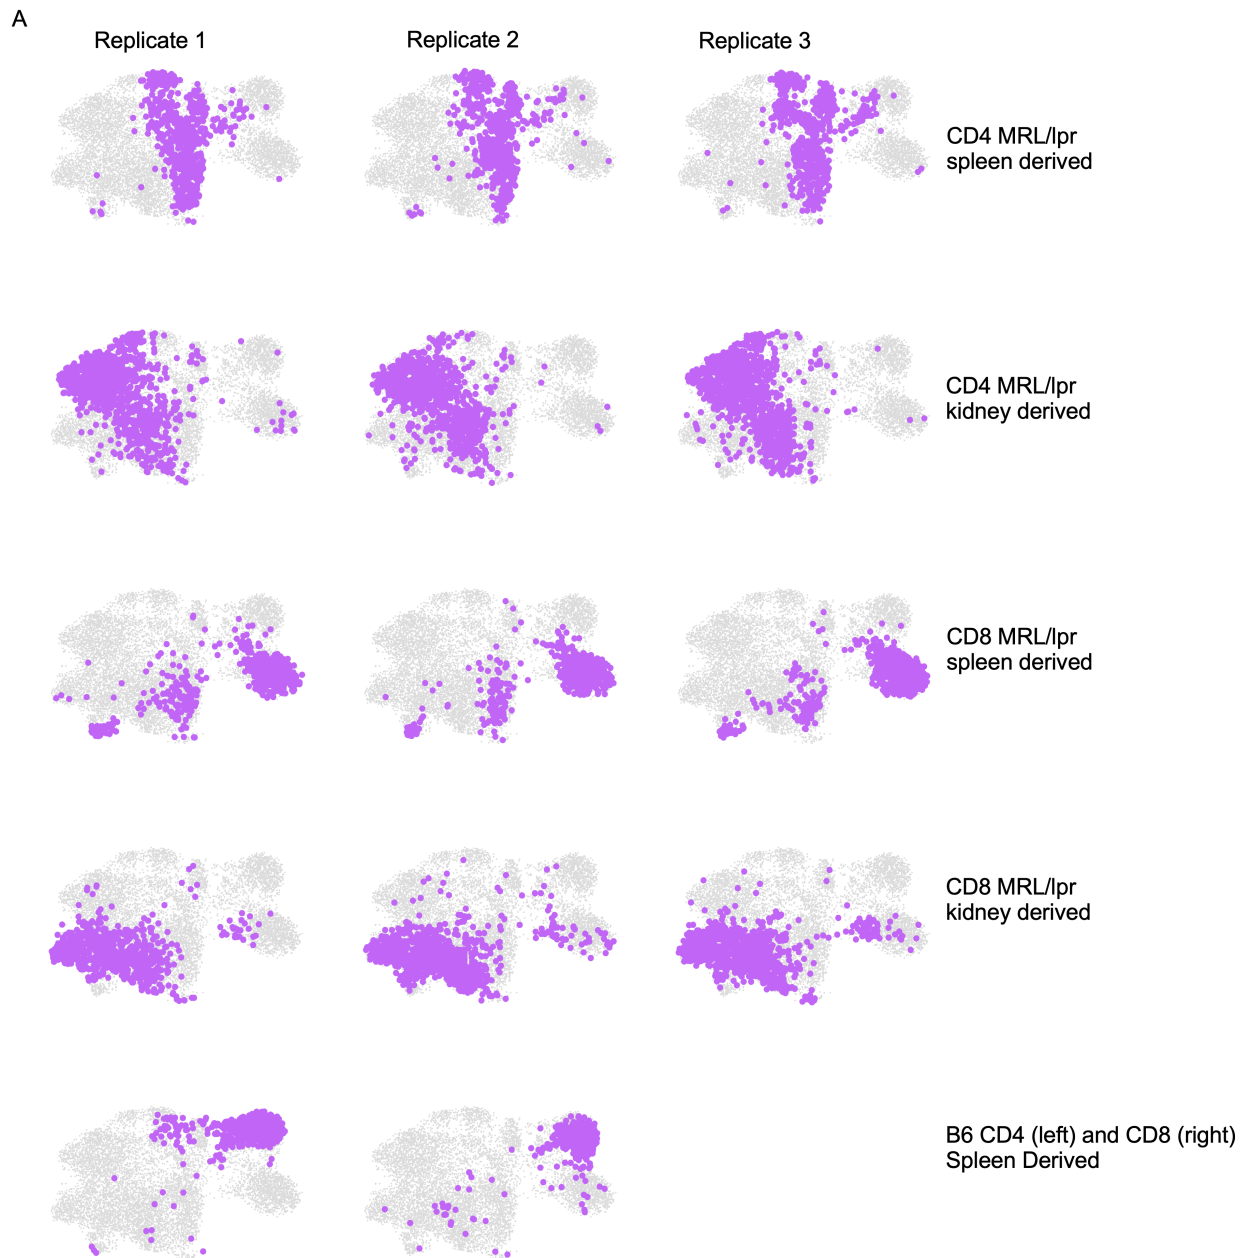

Supplemental Figure 1: *Analytics methodology* (A) Cell source determined using HTO for each of the 14 individual sorted populations was overlaid on the UMAP projection (as per Fig 1B) and organized based on replicates to exhibit the equal contribution of each replicate to the observed clusters.

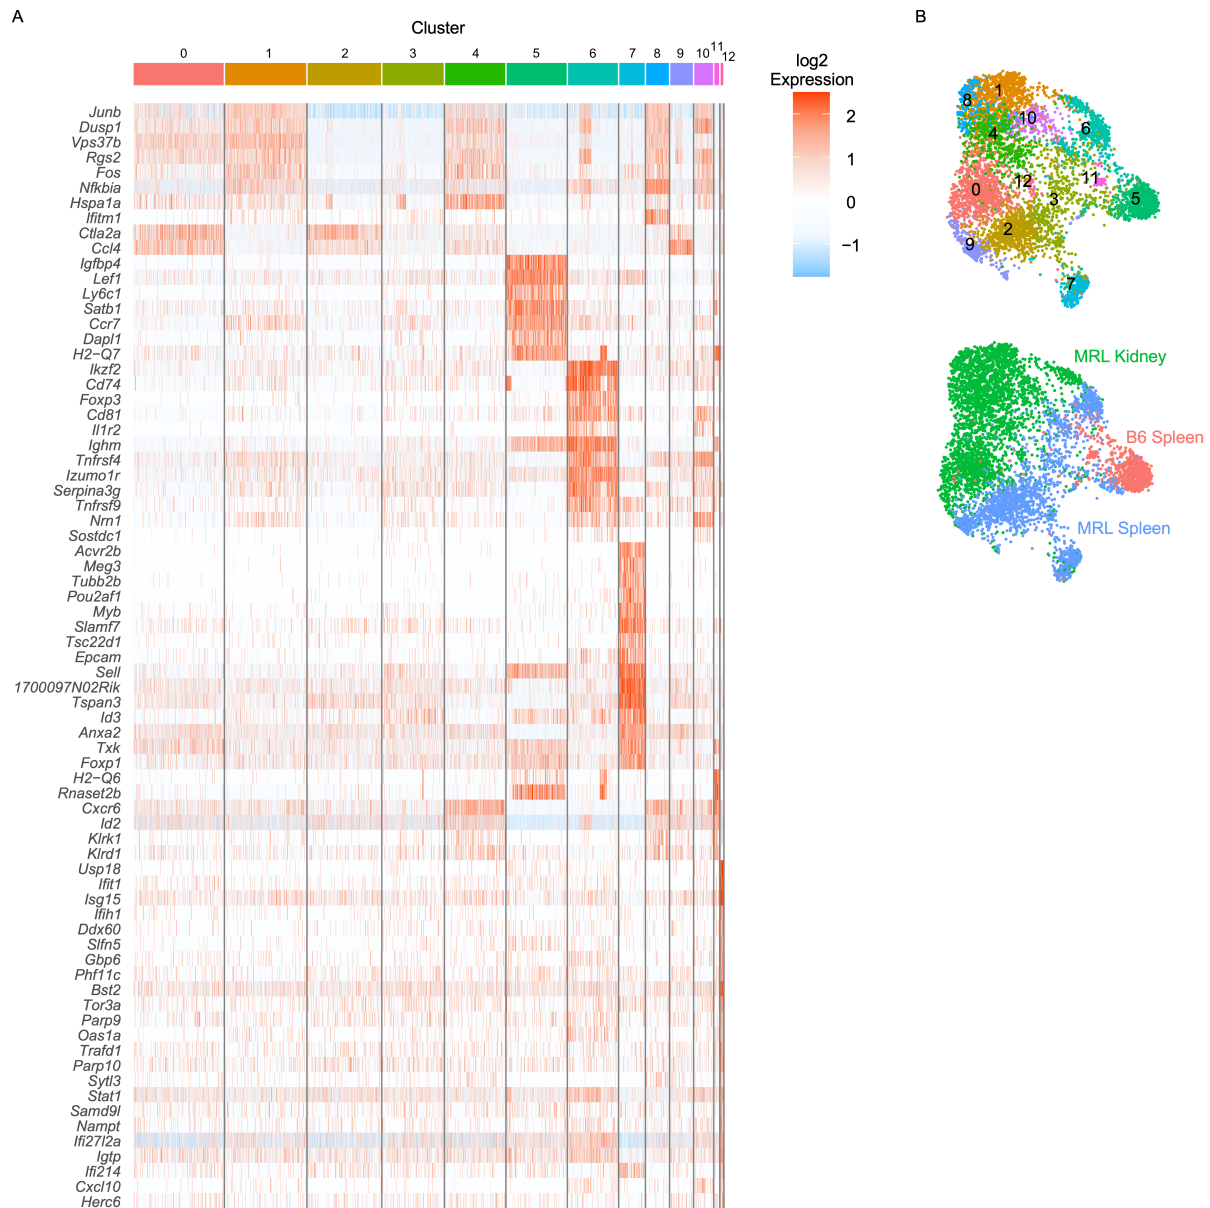

Supplemental Figure 2: *Top DEGs associated with CD4 T cell clusters.* (A) Heat map shows top (Fold change > 1 and FDR < 0.01) significant differentially expressed genes (rows) associated with the 13 CD4 clusters and their expression at the single cell level (columns), colored according to expression level. (B) With UMAP projection of CD4 T cells from Main-seq outlining 13 clusters, and overlay of cell source as determined by HTO (as defined in Figure 2).

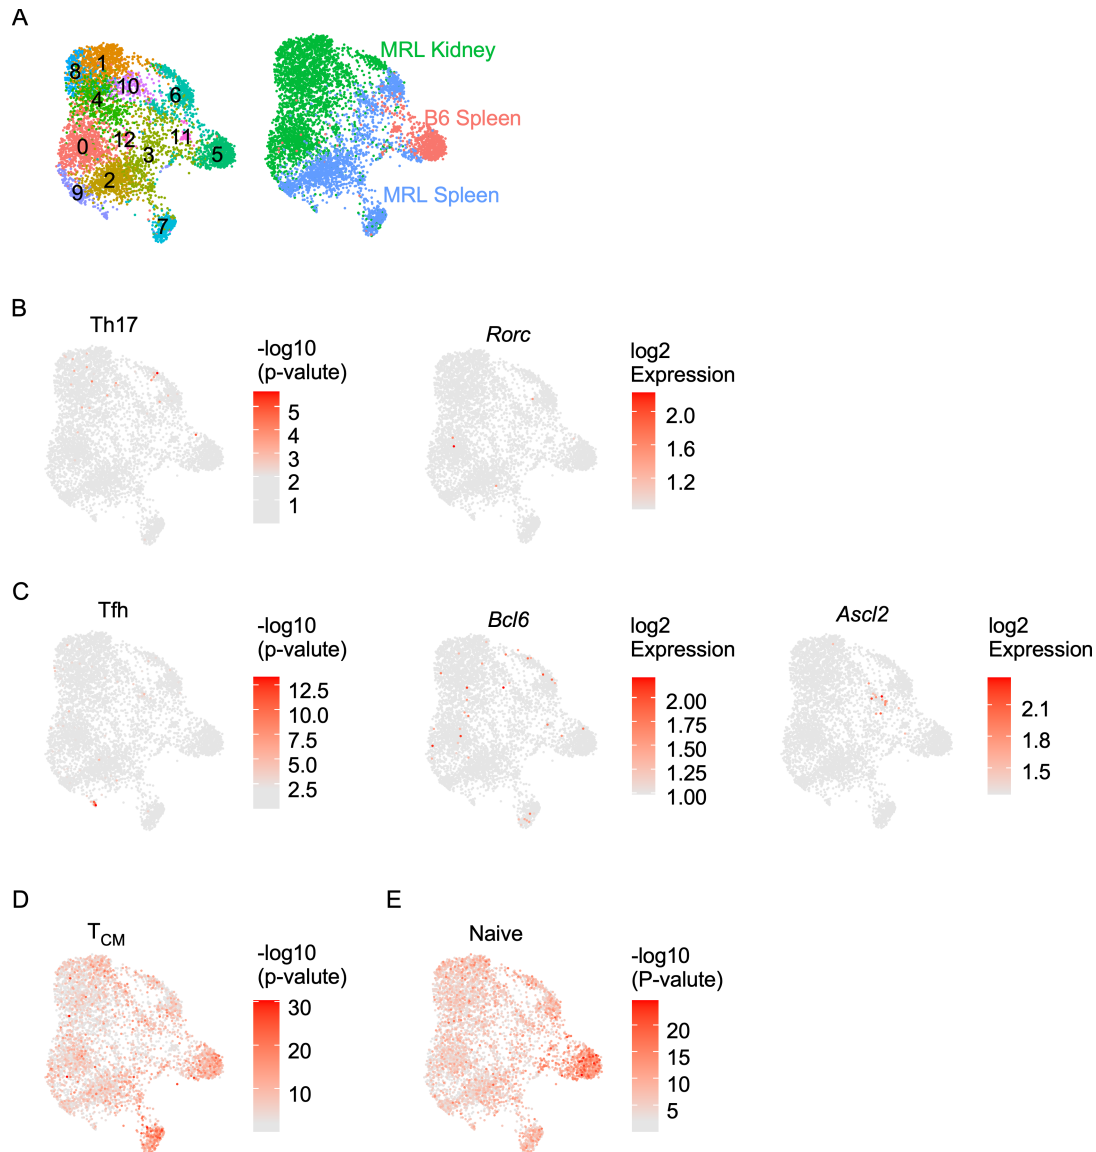

Supplemental Figure 3: GSEA and gene expression mapping identifies clusters and cells with a naïve and  $T_{CM}$  signature but not Th17 or Tfh populations. GSEA performed in each cell by Wilcox-test using published reference signature genes (Table S1) and related TF expression is mapped onto the (A) CD4 UMAP and HTO defined cell source to identify CD4 T cell phenotypes. (B) Th17 gene signature and associated TF *Rorc*; (C) Tfh gene signature and associated transcription factors *Bcl6* and *Ascl2*; and gene signatures for (D)  $T_{CM}$  and (E) naïve populations.

A

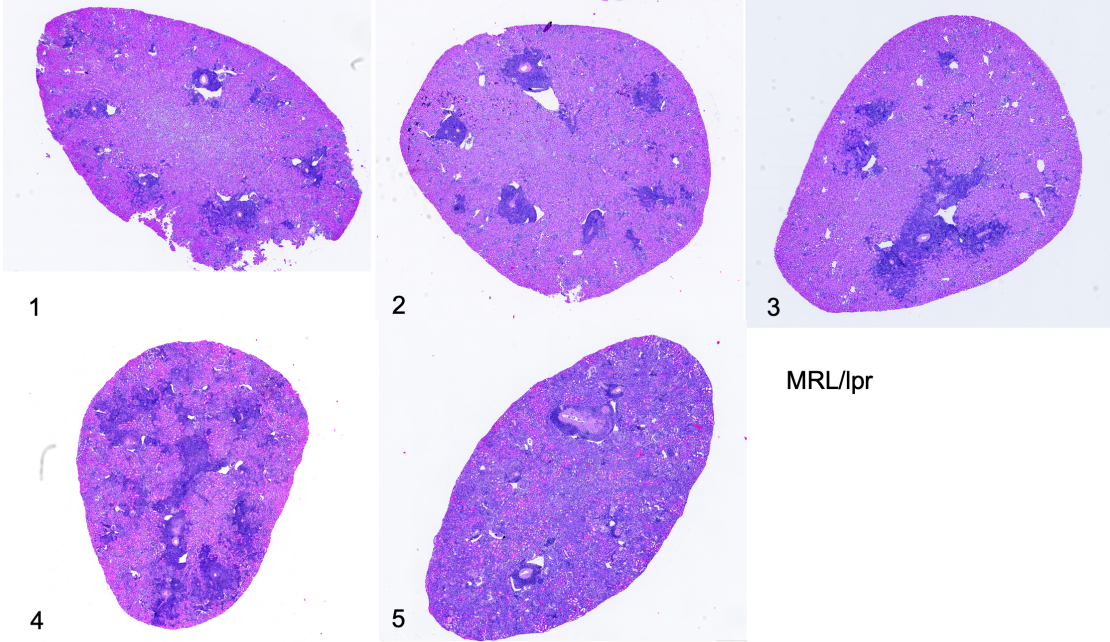

B

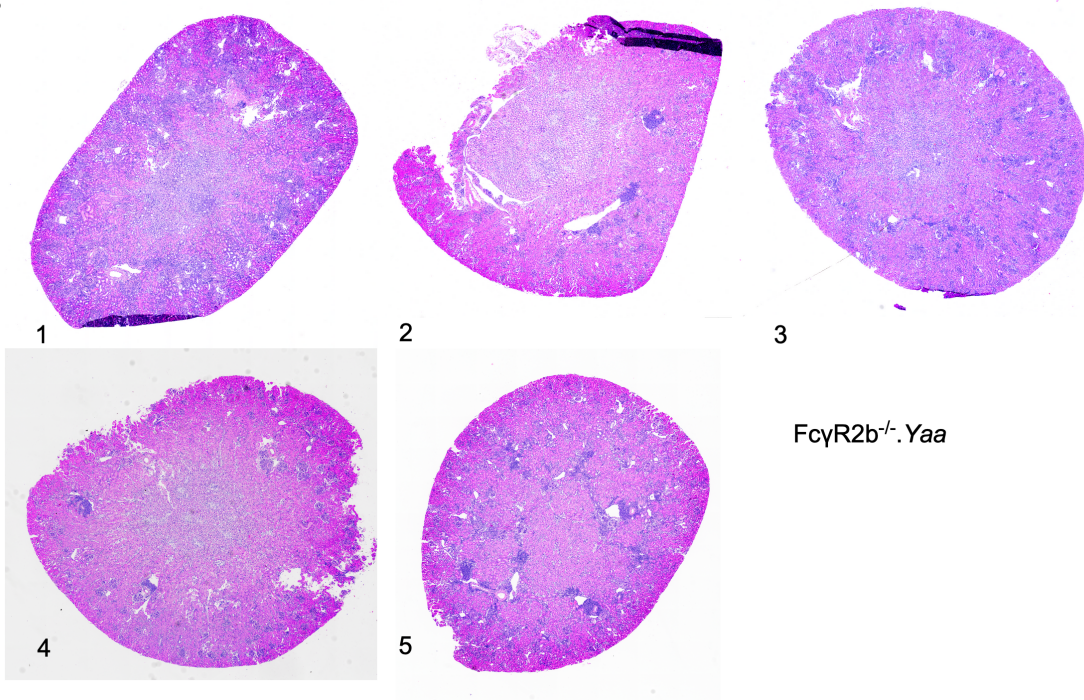

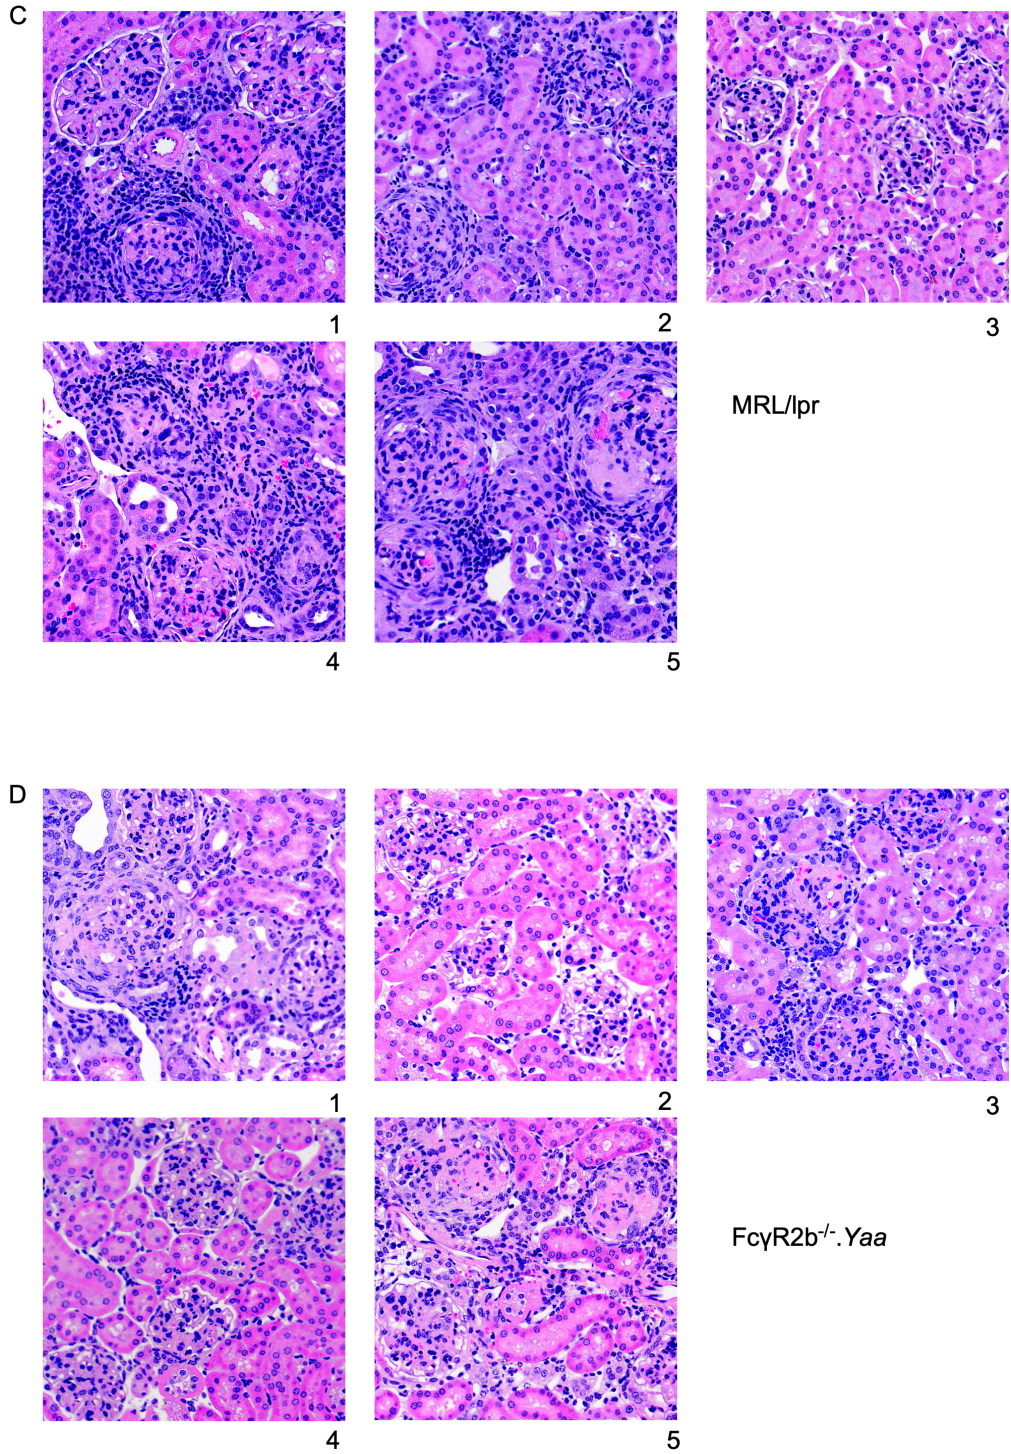

Supplemental Figure 4: H&E stained cross section of kidneys from mice analyzed in (A) cohort 2 (MRL-TCRseq), and (B) cohort 3 (Yaa-TCRseq), with high resolution 20x images of representative glomeruli for (C) cohort 2 mice (MRL-TCRseq), and (D) cohort 3 (Yaa-TCRseq). Associated disease scoring is included in Supplemental Table 2.

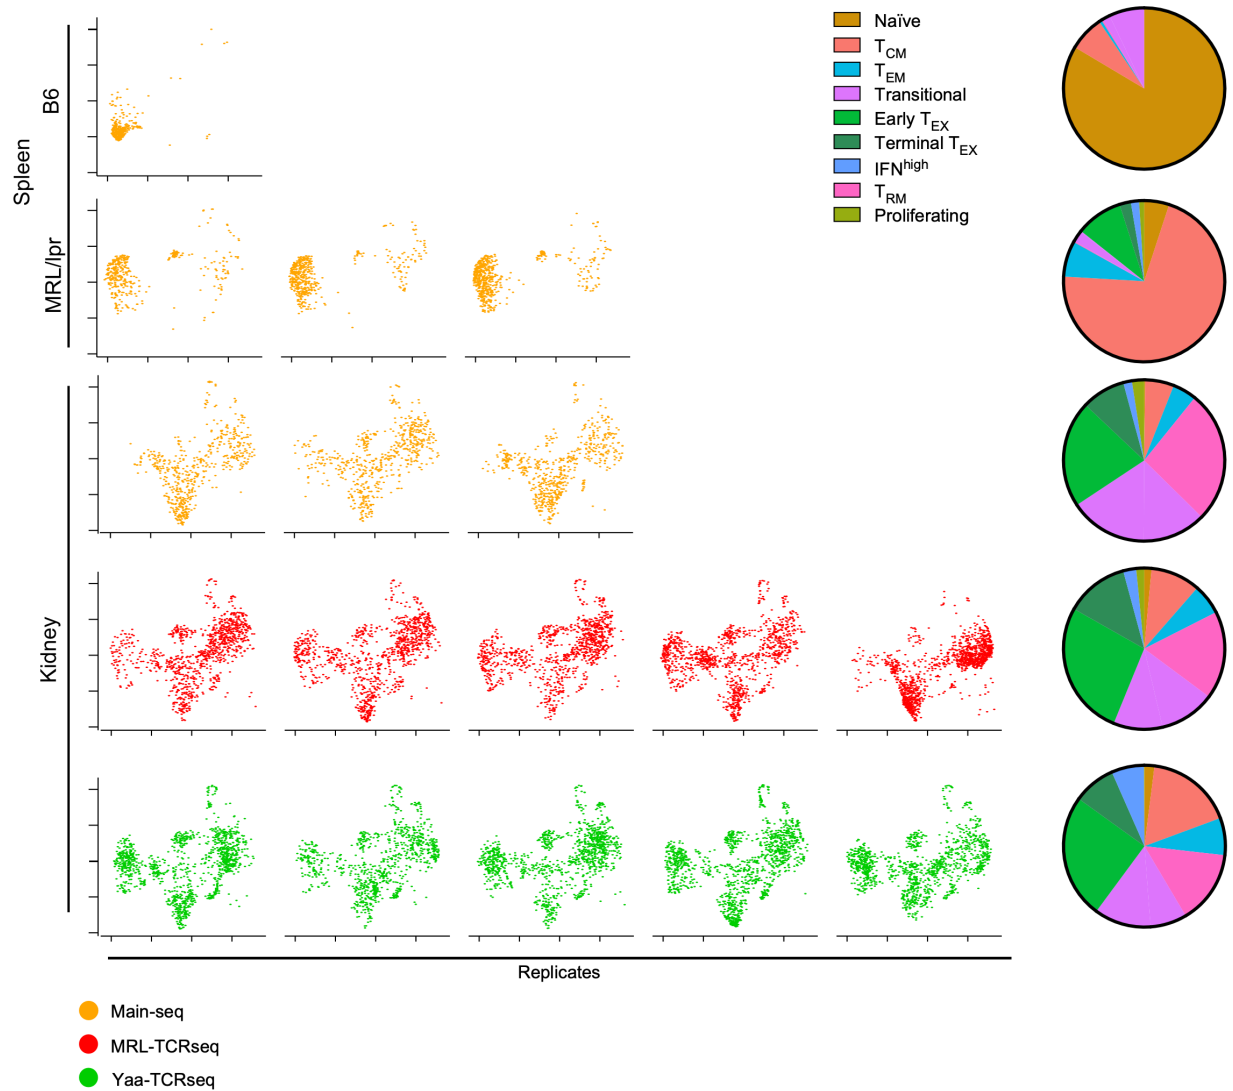

Supplemental Figure 5: *Cluster contribution by mouse and cohort.* Mouse by mouse contribution to combined CD8 UMAP cluster as defined in Figure 5. Each row of UMAP plots represents a single source and origin. The cohort derivation of each UMAP plot is color-coded according to the legend. Pie charts to the right represent relative phenotypically-identified cluster distribution of T cells within combined cells from each source/origin.

A

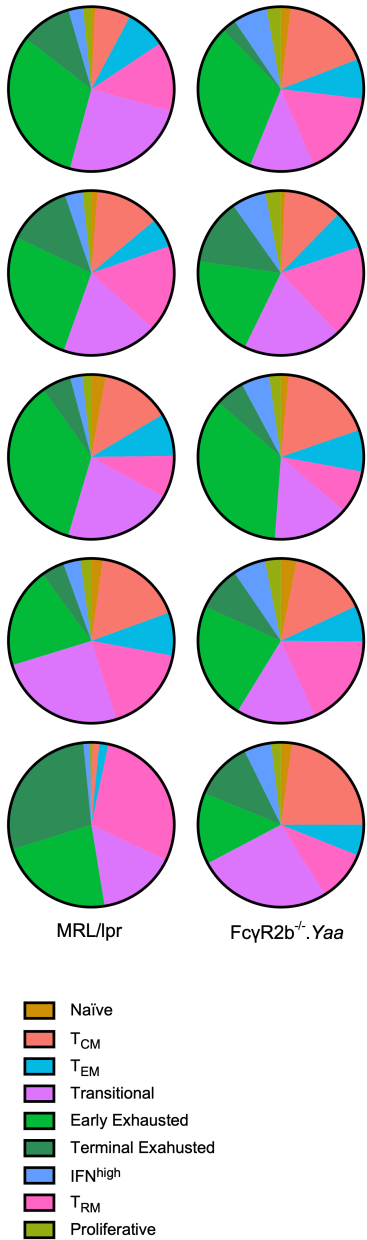

B

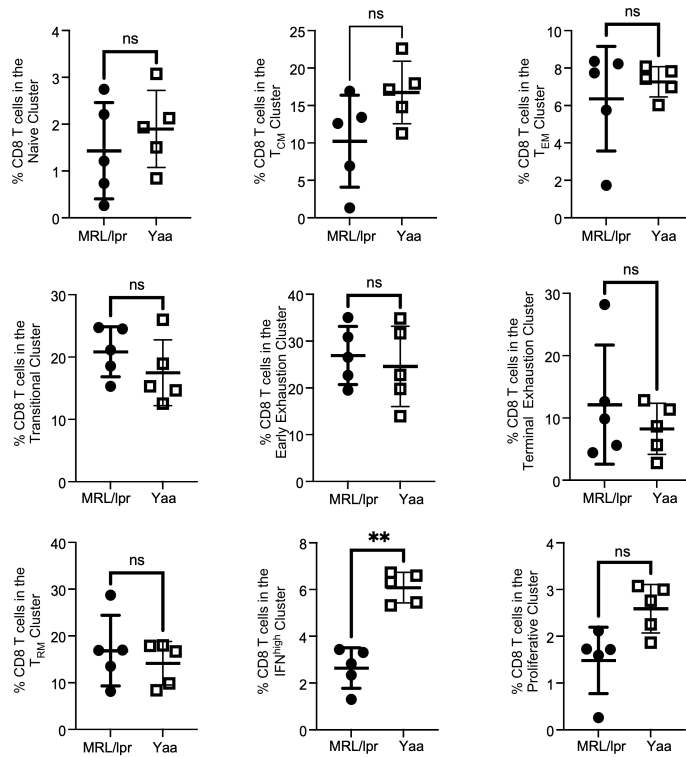

C

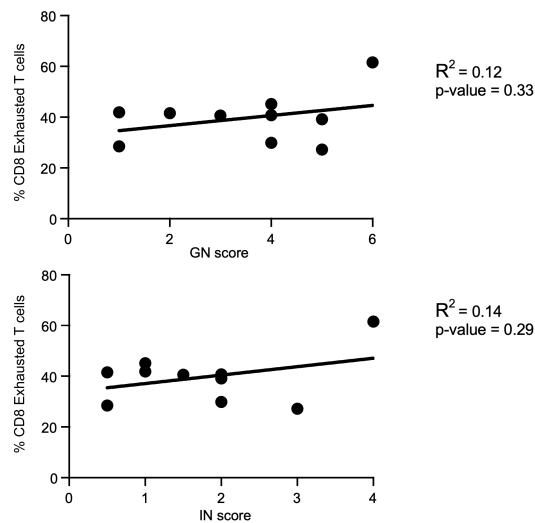

Supplemental Figure 6: *CD8 Cluster distribution does not differ by mouse model or based on histologic disease.* (A) Pie charts represent relative phenotypically-identified cluster distribution of CD8 T cells defined in Figure 5 for each mouse assessed in cohort 2 and 3. (B) Dot plot represents percent of CD8 T cells from MRL/lpr and FcγR2B<sup>-/-</sup>.Yaa (Yaa) models in each outlined cluster. Statistics were determined using Two-way Anova with repeat measures corrected for multiple comparisons using Bonferroni adjustment (\*\*

indicates p-value <0.01). (C) Linear regression analysis of % exhausted T cells in each mouse and corresponding histologic disease score, either glomerulonephritis (GN) or interstitial nephritis (IN), with no analysis reaching statistical significance.



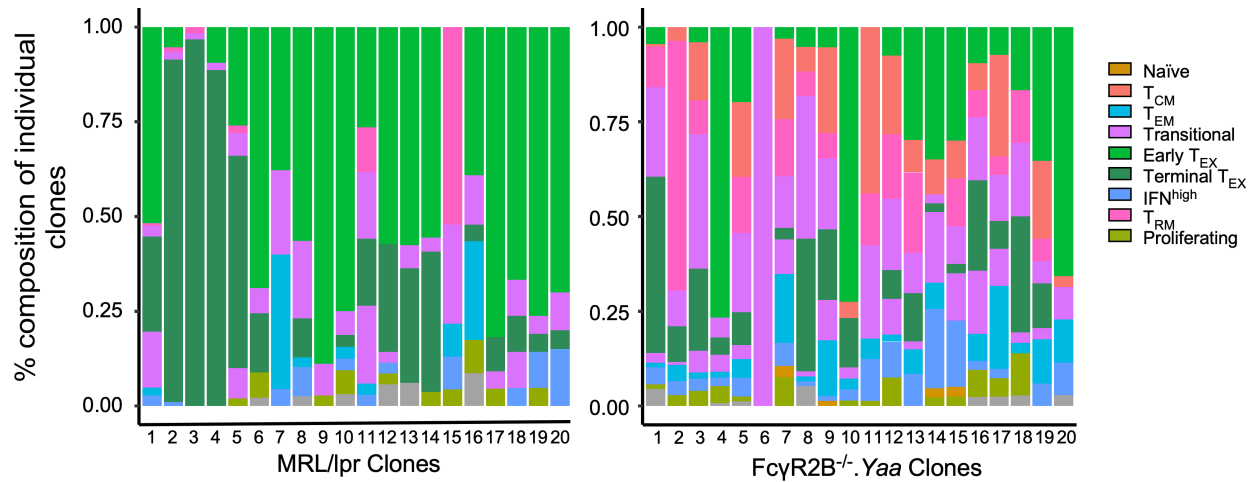

Supplemental Figure 7. *Progeny of the same T cell transition between different clusters within the kidney suggesting dynamic progression between T cell states.* Bar graphs represent the top 20 CD8 T cell clones from the MRL/lpr (left panel) and FcγR2B<sup>-/-</sup>.Yaa (right panel) models with the relative distribution of these clones within the putative T cell clusters as defined in Fig. 8 B/C.



|                     |           |               |
|---------------------|-----------|---------------|
| ATL3                | KIAA1078  | Mki67         |
| ATP10A              | KIAA1189  | Ndrq4         |
| ATP2B2              | KIAA1729  | Kif4          |
| AV249152            | KIAA1971  | Osbp13        |
| AW555355            | KIF2      | Ccnb2         |
| B230312A22RIK       | KIFAP3    | Endod1        |
| B3GALT5             | KLF7      | Birc5         |
| B4GALT1             | LASS6     | Endod1        |
| B4GALT5             | LCHN      | Cnn3          |
| B830008J18RIK       | LDHB      | Fads2         |
| B930095G15RIK       | LEF1      | Srxn1         |
| BACE2               | LENG10    | Kif11         |
| BAIAP2L1            | LEPROTL1  | S100a4        |
| BARD1               | LETMD1    | Zbtb32        |
| BB557941            | LGTN      | Lacc1         |
| BC010981            | LIAS      | Pbk           |
| BC023744            | LISCH7    | 8-Mar         |
| BC046404            | LKAP      | Tnfsf14       |
| BC068157            | LNPEP     | Gm3924        |
| BCL2L1              | LOC129293 | Endod1        |
| BCL2L15             | LOC143903 | Bmp7          |
| BCL6B               | LPAAT-e   | Gm34221       |
| BCMO1               | LRRC5     | Ctla2b        |
| BEND6               | LRRN3     | Alcam         |
| BMPR2               | LT44H     | Myo1f         |
| BNIP3               | LTB       | Plek          |
| BRCA2               | LY96      | Optn          |
| BSPRY               | LYPLAL1   | Srxn1         |
| BTBD10.LOC100047893 | MAGEH1    | Gstt3         |
| C130057M05RIK       | MAL       | Gm5593        |
| C1QL3               | MAML2     | Ccnb1         |
| C230098O21RIK       | MAN1C1    | Zdhhc2        |
| C76533              | MDS2      | Bub1          |
| C77545              | MEST      | Jdp2          |
| C80258              | MGC15763  | Tmem2         |
| CABLES1             | MGC17330  | 8030451A03Rik |
| CALCB               | MMS19L    | Chrd1         |
| CALD1               | MPHOSPH9  | Cdca8         |
| CAMK2N1             | MRPL1     | Soat2         |
| CAMK4               | MSL3L1    | S100a6        |
| CAPSL               | MTRF1     | Atp1b1        |
| CAR13               | MTUS1     | Morn4         |
| CAR6                | MYB       | Klrc1         |
| CAV1                | MYC       | Spag5         |
| CAV2                | NDE1      | Tjp2          |
| CCDC112             | NDFIP1    | Igfbp4        |
| CCDC122             | NDUFB5    | Ccna2         |
| CCDC21              | NELL2     | Ampd1         |
| CCDC34              | NGFRAP1   | Runx2         |
| CCL1                | NKX3-1    | Stfa3         |
| CCL27A              | NOG       | Igfbp4        |
| CCR8                | NRCAM     | Gm17619       |
| CD200R4             | NUCB2     | Tshz2         |
| CD34                | PCSK5     | Gpm6a         |
| CD70                | PDK1      | Ncapp         |
| CD93                | PHEMX     | Tk1           |
| CDC14A              | PIK3CD    | Kitl          |
| CDC14A.LOC100047731 | PLAC8     | Morc1         |
| CDC25C              | RAC2      | Dtl           |
| CDK6                | RAPGEF6   | Aifm2         |
| CENPA               | RASA2     | Gm36401       |
| CENPI               | RASA4     | Adam19        |
| CENPP               | RIN3      | Stil          |
| CETN4               | RNU22     | Kif14         |
| CHAC1               | SAMHD1    | Igfbp4        |
| CHST10              | SP110     | Ccnb1         |
| CHST12              | STK4      | Gzmk          |
| CIAPIN1             | STX16     | Proser2       |
| CILP2               | SUMF2     | Ccna2         |
| CKAP2               | T3JAM     | Rragd         |
| CLDN12              | TM4SF8    | Pawr          |
| CLEC4D              | TPP2      | Pif1          |
| CNNM2               | TTC11     | Ccnf          |
| CNRIP1              | USP52     | Esco2         |
| CNTLN               | VPS35     | 2810417H13Rik |
| COCH                | WDR42A    | Gna15         |
| COL1A2              | ZFP90     |               |
| COPZ2               | ZNF291    |               |
| CPA2                | ZNF44     |               |
| CPE.LOC100046434    |           |               |
| CRYBG3              |           |               |
| CSF2                |           |               |
| CTNND2.LOC100045979 |           |               |
| CTSC                |           |               |
| CTSD                |           |               |
| CXCL1               |           |               |
| CXCL2               |           |               |
| CXCL3               |           |               |
| CXCR6               |           |               |
| CYR61               |           |               |
| D17ERTD165E         |           |               |
| D18ERTD289E         |           |               |
| D330040H18RIK       |           |               |
| D3ERTD751E.GM9529   |           |               |
| D430033H22RIK       |           |               |
| D5WSU178E           |           |               |

D9ERTD26E  
DAB2IP  
DCLK1  
DCN  
DEGS1  
DENND4A  
DEPDC1A  
DLG2  
DMXL2  
DNAJC12  
DNAJC25  
DPYSL3  
DRAM1  
DSC2  
DSCAM  
DUSP16  
DXERTD242E  
E2F7  
E33009J07RIK  
EIF2AK2  
ELK3  
ELOVL4  
ENO2  
EPAS1  
EPS8L3  
EREG  
EXPH5  
F13A1  
F630043A04RIK  
FAM110A  
FAM178B  
FAM19A3  
FAM20C  
FAM54A  
FAM5C  
FAM64A  
FANCC  
FANCD2  
FANCF  
FARP1  
FARS2  
FAT1  
FBXO11  
FCHO2  
FGFBP3  
FHL2  
FILIP1  
FKBP7  
FLOT2  
FN1  
FOXF1A  
FOXG1  
FOXM1  
FOXRED2  
FRMD4A  
FRZB  
FST  
FTSJD1  
FUCA2  
FZD4  
FZD6  
GABRR1  
GALC  
GALNT3  
GALNTL4  
GAN  
GAS2  
GGTA1  
GIPC2  
GJA1  
GJB2  
GLDC  
GLP1R  
GLT8D3  
GM14057.PPP1R14C  
GM14288  
GM5188  
GM6194.TMEM189  
GM9861.LITAF  
GNB5  
GOLGA7  
GPD2  
GPLD1  
GPR160  
GPR177  
GPR65  
GPR97  
GRB10  
GREM1  
GRP  
GSTM5  
GSTT1  
GSTT3  
GTF2IRD1  
GZMD  
GZMD.GZME

GZME  
GZMF  
GZMG  
H2.Q5  
HBEGF  
HCFC2  
HECTD2  
HHAT  
HIGD1A  
HIP1R  
HISPPD1  
HIVEP1  
HMGA2  
HMMR  
ICA1  
IDI2  
IFI204  
IGF2R  
IGFBP7  
IGSF5.PCP4  
IL1R2  
IL1RL1  
IL33  
IMPA2  
IQGAP3  
IRAK1BP1  
IRG1  
ITGAV  
ITIH5  
ITLN1  
JAM2  
JAZF1  
KAZALD1  
KCNA4  
KCNF1  
KCNK10  
KCTD9  
KIF13B  
KIF18A  
KIF24  
KIF4  
KIFC1.LOC100044746  
KIFC3  
KLRA7  
KLRB1A  
KLRC2  
KLRD1  
KLRE1  
KRT20  
LAMB1.1  
LANCL1  
LGALS7  
LOC100044896.SCCPDH  
LOC100046560.MAGED2  
LOC100047565.MMD  
LOC633966  
LOC640441.THBS1  
LOC641050  
LOC677224  
LPAR1  
LTBP1  
LTBP3  
LTF  
LXN  
MAGOHB  
MAPK6  
  
MARVELD2  
MASTL  
MED12L  
MELA  
MGP  
MLF1  
MLKL  
MMD  
MOBK1A  
MORN3  
MORN4  
MRC2  
MT2  
MTAP2  
MTAP6  
MTHFS  
MTMR7  
MUC1  
MUC20  
MXD3  
MX11  
MYLK  
MYO10  
MYO16  
MYO1E  
NAP1L3  
NCAM1  
NCOR2  
NDFIP2

NEDD9  
NEIL3  
NELF  
NFAT5  
NFATC1  
NHEDC2  
NID1  
NMT2  
NPHS2  
NPNT  
NR3C1  
NSBP1  
NSMAF  
NT5E  
NUDT11  
NUPR1  
OBFC2A  
OCIAD2  
ODZ4  
OMD  
OPTN  
ORCLL  
OSGIN1  
OSR2  
OSTF1  
OTX1  
OVOL2  
PAD12  
PAQR3  
PASK  
PAWR  
PBX3  
PCK2  
PCOLCE  
PCYT1A  
PDCD1  
PDGFB  
PDPN  
PEAR1  
PENK  
PERP  
PGGT1B  
PHACTR3  
PI4K2B  
PIWIL2  
PKD2  
PLA1A  
PLAGL1  
PLD2  
PLOD2  
PLSCR4  
PON3  
PPP1R16B  
PPP1R3B  
PRF1  
PRICKLE2  
PRKG2  
PRR15  
PRRX1  
PTER  
PTGS1  
PTPLAD1  
PTPLB  
PTPN3  
PTPRK  
RAB19  
RAB39B  
RABGEF1  
RAD54B  
RAI14  
RALGDS  
RAPH1  
RAPSN  
RASD2  
RBP1  
RBPJ  
REM2  
RETSAT  
RGS8  
RHOQ  
RHOU  
RHOX5  
RNF128  
RPA2  
RPGR  
RYK  
SAG  
SDCBP2  
SDF4  
SDPR  
SECTM1A  
SEMA4C  
SEMA6D  
SEPHS1  
SERPINB6A  
SERPINB9B

SGMS2  
SGOL2  
SIGLEC5  
SLC15A1  
SLC16A11  
SLC16A3  
SLC16A4  
SLC17A6  
SLC22A15  
SLC25A19  
SLC2A8  
SLC30A9  
SLC37A2  
SLC39A14  
SLC5A3  
SLC6A12  
SLC7A3  
SLFN3.SLFN4  
SMPD4  
SMPDL3B  
SMYD1  
SNX16  
SOX9  
SPA17  
SPAG5  
SPAG9  
SPARC  
SPATS2  
SPDYA  
SPIN4  
SPIRE1  
SPO11  
SPP1  
SRXN1  
SSBP3  
ST14  
ST6GALNAC3  
ST6GALNAC6  
STARD4  
STFA3  
STK38L  
STK40  
STYK1  
SULT2B1  
SUOX  
SUV39H2  
SYNC  
SYTL3  
TEAD1  
TEX15  
TFF1  
TG  
THBS1  
THBS2  
TIMP1  
TJP1  
TJP2  
TM4SF1  
TMED8  
TMEM120B  
TMEM135  
TMEM158  
TMEM159  
TMEM170B  
TMEM171  
TMEM184C  
TMEM218  
TMEM30A  
TMPRSS6  
TNFRSF18  
TNFSF13B  
TNFSF4  
TPBG  
TPK1  
TPMT  
TRAIP  
TRIM36  
TRIM72  
TRIP10  
TROVE2  
TRPC1  
TTK  
TULP4  
TUSC3  
TWIST1  
TWSG1  
UBASH3B  
UHRF2  
ULBP1  
UPP1  
VASH1  
VAT1L  
VLDLR  
VPS54  
WSP1  
WWC1

WWTR1  
ZBTB25  
ZCCHC14  
ZFP580  
ZFP862  
0610010B08RIK.GM14295.LOC627901  
1110004F10RIK  
1110067D22RIK  
1300014I06RIK  
1500009L16RIK  
1700025K23RIK  
2010002N04RIK  
2410127L17RIK.LOC677553  
2510009E07RIK  
2600001M11RIK  
2610027H17RIK  
2610029I01RIK  
2610318N02RIK  
2700097O09RIK  
2810417H13RIK  
3110073H01RIK  
4921509J17RIK  
4930547N16RIK  
4930551O13RIK  
4933413G19RIK.FOXM1.PEBP1  
6330503K22RIK  
A430093F15RIK  
A630035D09RIK  
AA467197  
ABHD14A  
ABHD4  
ABI2  
ACADL  
ACOT7  
ADAM9  
ADM  
ADRB1  
A1747699  
A1847670  
ALAD.LOC100046072  
ALCAM  
ALDOA  
ALDOC  
ANXA1  
ANXA2  
ANXA3  
ANXA4  
AP1S2  
ARF2  
ARHGAP18  
ARL3  
ARL6  
ARPC1A  
ARSB  
ASNS  
ASPM  
ATAD5  
ATP6V0E2  
ATRNL1  
ATXN1  
AW555464  
AXL  
B3GALT  
BCAT1  
BCL2A1A.BCL2A1B.BCL2A1D  
BHLHE40  
BIRC5  
BST1  
BUB1  
BUB1B  
C030046G05  
C1QTNF6  
C330027C09RIK  
CALM3  
CALU  
CAPG  
CAR5B  
CARHSP1  
CASP1  
CASP3  
CASP4  
CCDC109B  
CCDC50  
CCL3  
CCL4  
CCL5  
CCNB1  
CCNB1.GM5593.GM8416  
CCNB2  
CCR5  
CCRL2  
CD14  
CD160  
CD200  
CD244  
CD244.LOC677008



CD38  
CD81  
CDC27  
CDC2A  
CDCA2  
CDCA3  
CDCA5  
CDCA8  
CDKN1A  
CDKN2B  
CDKN3  
CENPF  
CENPH  
CENPN  
CEP55  
CHN2  
CHSY1.LOC100047167  
CISD3  
CLIP3  
CMTM7  
CNIH  
COBLL1  
CREB3L2  
CRYZ  
CSDA  
CSF1  
CSRNP1  
CST7  
CTLA2A  
CTLA2A.CTLA2B  
CTLA4  
CUGBP2  
CWC15  
CX3CR1  
CYP20A1  
CYP4V3  
CYSLTR2  
CYTSB  
D1ERTD83E  
D2ERTD750E  
D630039A03RIK  
DAPK2  
DCTN4  
DCXR  
DDX28  
DENND3  
DIAP3  
DKKL1  
DPY19L4  
DTL  
DUSP14  
DUSP3  
DUSP4  
DUSP6  
DUT  
DYNLT3  
E2F3  
E2F8  
ECE1  
ECT2  
EFHD2  
EGR1  
EHBP1  
EHD4  
EMILIN2  
ENDOD1  
ENO1.GM4735.GM5506.LOC100047043  
ENTPD1  
EPDR1  
ERGIC1  
ERMP1  
ERN1  
ERO1L  
ESCO2  
ETV5  
EXO1  
FAH  
FAM124B  
FAM162A  
FAM176B  
FAM72A  
FAM83D  
FAM92A  
FAM98B  
FASL  
FBXO45  
FCER1G  
FGL2  
FLYWCH1  
FOS  
FOSL2  
FZD5  
GABARAPL1  
GAPDH.GM10284.GM10358.GM12969.GM2076.GM2308.GM2451.GM2606.GM3222.GM5674.GM6283.GM6322.GM8349.LOC100044981.LOC100045908.LOC100047352.LOC100048329  
GATA3  
GBE1

GCNT1  
GCSH  
GDAP2  
GEM  
GEMIN8  
GINS1  
GLRX  
GM10397  
GM10786  
GM12397.KDM2B  
GM9790.HIGD1A.LOC100045763  
GMEB2  
GPM6B  
GPR174  
GPT2  
GRK5  
GSTO1  
GZMC  
HIF1A  
HIP1  
HIST1H2AD  
HIST1H2BC  
HSPA13  
HSPA2  
HTATIP2  
ICOS  
ID2  
IER3  
IFITM2  
IFITM3  
IFNG  
IKZF2  
IL18RAP  
IL2RA  
INO80C  
IPO8  
IRF4  
ITGA1  
JDP2  
KCNQ5  
KCTD17  
KDELC2  
KDM2B  
KDM4D  
KIF20A  
KIF22  
KIF2C.LOC631653  
KIT  
KLF10  
KLRA3.KLRA9  
KPNA2  
KRT18  
LAG3  
LAMC1  
LANCL3  
LASS6  
LAT2  
LCLAT1  
LCMT1  
LGALS3  
LITAF  
LOC100046168.NDFIP1  
LOC100046232.NFIL3  
LOC100046643.SPRY1  
LOC100047091.TMEM163  
LOC676654.LYN  
LOC677224.UBASH3B  
LOH12CR1  
LPGAT1  
LPXN  
LRRK1  
LYZ1  
LYZ2  
MDFIC  
MEST  
METTL7A1  
MID1P1  
MID2  
MND1  
MRC1  
MRPS6  
MS4A6D  
MT1  
MTHFD2  
MXRA7  
MYADM  
MYST4  
NAIP2  
NCAPG2  
NCAPH  
NDC80  
NDRG1  
NEBL  
NEK2  
NEK7  
NIPA2

NKG7  
NLRX1  
NOL7  
NQO2  
NR4A2  
NRGN  
NRN1  
NRP1  
NT5DC2  
NUF2  
OLFM1  
OSBPL3  
PAQR4  
PDCD1LG2  
PF4  
PGK1  
PGLYRP1  
PGM2  
PHACTR2  
PHACTR4  
PHLPP1  
PIK3CG  
PKM2  
PLEK  
PLEKHB2  
PLEKHF1  
PLEKHO2  
PLK1  
PLS3  
PLSCR1  
PLXDC2  
PMAIP1  
PPAP2C  
PPFIBP1  
PPP3CB  
PRC1  
PRDM1  
PROS1  
PRR11  
PRSS2  
PTGER2  
PTGFRN  
PTGR1  
PTGS2  
PTPN11  
PTPN13  
PTTG1  
PXMP2  
PYGL  
RAB31  
RABL5  
RAD51  
RAP2A  
RASGEF1B  
RFC3  
RGS16  
RHOC  
RNF216  
RRAGC  
S100A1  
S100A11  
S100A4  
S100A8  
S100A9  
SAMSN1  
SAT1  
SCD2  
SDC1  
SDC4  
SEC23A  
SELM  
SEPN1  
SERPINA3G  
SERPINB1A  
SERPINB6B  
SERPINB9  
SERPINE2  
SESTD1  
SH2D2A  
SH3BGRL  
SH3RF1  
SHCBP1  
SLC15A3  
SLC25A13  
SLC25A24  
SLC2A3  
SLC35B1  
SLC35F5  
SLC43A3  
SLCO4A1  
SLFN3  
SMC2  
SNRNP25  
SNX9  
SPOCK2  
SPRY2

SRGAP3  
STARD3NL  
STIL  
STK24  
STK39  
STX11  
SYNPO  
SYTL2  
TACC3  
TBC1D8B  
TBX21  
TCRG.V2.TCRG.V3  
TCRG.V4  
TCTEX1D2  
TFG  
TIAM1  
TIRAP  
TK1  
TMBIM1  
TMCC3  
TMEM126A  
TMEM38B  
TMEM48  
TMEM49  
TMSB15B1.TMSB15B2.TMSB15B2  
TNF  
TNFRSF4  
TNFRSF9  
TNFSF10  
TNFSF11  
TNFSF9  
TOX  
TPI1  
TPX2  
TRAM1  
TRIB3  
TRPS1  
TSGA10  
TTC39C  
TUBB6  
TYMS.TYMS.PS  
UBE2C  
UCHL5  
UGP2  
UGT1A1.UGT1A10.UGT1A2.UGT1A5.UGT1A6A.UGT1A6B.UGT1A7C.UGT1A9  
UNC119  
UNC119B  
UTF1  
VAMP8  
WBP5  
XCL1  
XDH  
ZBTB32  
ZC3H12A  
ZC3H6  
ZCCHC24  
ZDHHC2  
ZDHHC5  
ZEB2  
ZFP316  
ZFP511  
ZFP52  
ZWILCH  
1110007C09RIK  
1810011H11RIK  
2300004M11RIK  
2310031A07RIK  
2900057E15RIK  
3110021A11RIK  
4933424G06RIK  
6430531B16RIK  
A930038C07RIK  
ACAD11.NPHP3  
ADAM8  
AF251705  
AF529169  
AGTRAP  
AIF1  
ALOX5  
ALOX8  
ANKRA2  
ANKRD39  
ANPEP  
APOC2  
APOE  
APP  
ARG2  
ARMC1  
ARMC3  
ARSK  
ATCAY  
B4GALNT2  
B4GALT7  
BASP1.LOC100045716  
BC004728  
BIRC1F

C1QA  
C1QC  
C230073G13RIK  
C3AR1  
C4B  
C5AR1  
C79607  
C920021A13  
CALCA  
CBARA1  
CCL12  
CCL2  
CCL6  
CCL7  
CCL8  
CCL9  
CCNB1.GM4870.GM5593.GM8416.LOC635091  
CCND1  
CCR1  
CD200R1  
CD40  
CDH17  
CEP170  
CERCAM  
CKB  
CLDN14  
CLEC4A2  
CLEC4A2.CLEC4B1  
CLEC4A3  
CLEC4E  
CLEC5A  
CLEC7A  
CLIP2  
CMA1  
CMTM3.LOC100046883  
COL4A4  
COMMD5  
CPA3  
CRAT  
CSF2RA  
CTTNBP2NL  
CXCL11  
CXCL16  
CXCL9  
CYP4F16  
D030028M11RIK  
D430041D05RIK  
DAB2  
DDEF2  
DIO2  
DLL1  
DUSP9  
EIF2AK1  
ELAC1  
EPS8  
FAM149A  
FAM69B  
FBXO31  
FCGR1  
FCGR2B  
FCGR3  
FCGR4  
FOXD2  
FPR2  
FTL1.FTL2.GM10116.GM12164.GM5213.GM5278.LOC434624.LOC630762  
GAB2  
GABBR1  
GATM  
GDA  
GDPD5  
GFRA2  
GM11428  
GM5113  
GPR56  
GPR84  
GSG2  
GTPBP3  
HAVCR2  
HTR7  
IGF2BP2  
IGH.IGH.2.IGH.VJ558.LOC544903  
IGSF6  
IL1B  
IL1RN  
ITGA5  
KIF20B  
KLHL30  
KNDC1  
LDLR  
LGMN  
LILRB3  
LIPE  
LMBRD1  
LOC100038947.SIRPB1  
LOC100045163.PLBD1  
LOC100048154.OTOA

LRP1  
MAFB  
MCPT4  
MCPT8  
MGAT3  
MLST8  
MMP12  
MMP14  
MS4A6C  
MS4A7  
MSR1  
MSRB3  
MTBP  
NAIP5  
NBEAL2  
NCSTN  
NDUFB4  
NEK8  
NHEJ1  
NPL  
NUDT10  
OIT3  
OSM  
P2RY6  
PCGF2  
PDDC1  
PDLIM7  
PDXDC1  
PEX11B  
PI4K2A  
PILRA  
PLAU  
PLCD1  
PLEKHF2  
PLEKHO1  
PLXNB2  
PLXND1  
PPAP2A  
PPP1R14A  
PPP2R2C  
PRR5L  
PTRF  
PXN  
QSOX1  
RAB11FIP5  
REEP4  
RENBP  
RHBDF2  
RIBC1  
RIPPLY3  
  
SFP1  
SH2D5  
SLC11A1  
SLC13A3  
SLC16A13  
SLC6A9  
SLC7A8  
SPATA2L  
SRCRB4D  
ST3GAL5  
STAB1  
TBXAS1  
TGFB1  
TIFAB  
TLR2  
TLR4  
TMEM106A  
TMEM119  
TMEM208  
TPSAB1  
TPSB2  
TREM2  
TRIM45  
TSPAN33  
TSPAN6  
TTLL10  
USH1C  
VPS18  
WDR60  
WDR67  
ZFX3  
ZFP704  
ZFP710  
ZFP90  
ZNHIT2  
1110032A03RIK.LOC100048251  
1700019D03RIK  
1700029115RIK  
2310001H17RIK  
2810039B14RIK  
3110082117RIK  
4833420D23RIK  
4930595D18RIK  
4932415G12RIK  
5330433J24RIK

5430439M09RIK  
9130009I01RIK  
9330180L21RIK.SFMBT1  
A130009E19RIK  
A230083N12RIK  
AA407331  
ACSL5  
ACTR10  
AI450241  
AIM2  
ALG8  
ANKLE1  
APOBEC3  
AQP11  
ARMC7  
AW552393  
B230354K17RIK  
BBS12  
C430042M11RIK  
C530028O21RIK  
C78115  
CBR4.LOC100046395  
CCDC14  
CCDC58  
CCDC99  
CCHCR1  
CD22  
CD79A.LOC100047815  
CD80  
CLSTN1  
COMT1  
COX17  
CRABP2  
CRTAM  
CSTAD  
D10627  
D10WSU159E  
DCI  
DIP2A.LOC100044059  
DNAJC24  
DOCK7  
E030047P09RIK  
E130112N10RIK  
EBAG9  
EEA1  
EFCAB7  
EHD2  
ELMO2  
ENO3  
ENPP2  
EPHB6  
FAM129B  
FAM188A  
FAM57A  
FHL3  
FKBP1A  
FUT7  
GAS2L1  
GCNT7  
GH  
GM11110  
GM885  
GNG11  
GNG3  
HBA.A1.HBA.A2  
HIGD1C.METTL7A1.METTL7A2  
HIGD1C.METTL7A2  
HNRPLL  
HSPB9  
IDE  
IDH3A  
IL15RA  
IL2  
INTS9  
IPP  
ITGAL  
KCND3  
KCTD11  
LOC100045146.RANBP9  
LOC100047840.STAP1  
LOC100048604.NINJ2  
LOC73899  
LPAR3  
LPCAT4  
LRRC20  
LRRC4  
LYRM1  
MMGT2  
MOSPD2  
MPZL2  
MRGPRE  
MRPS36  
MSC  
MTMR1  
NDUFAF2  
NDUFC1

NFKBIL1  
NME7  
NSL1  
OAZ2  
ORC4L  
PEX11A  
PHF23  
PHKA2  
PIGN  
PLEKHH1  
POLH  
POLK  
POPC2  
PRKACA  
PRMT1  
RAB27A  
RAB7  
RIN3  
RNASEH2C  
RNF170  
RPS6KC1  
S100A10  
SDCCAG10  
SRP54A.SRP54B.SRP54C  
SUDS3  
SYT11  
TARSL2  
TBC1D2B  
TBC1D7  
TM9SF3  
TMBIM4  
TMEM180  
TMEM29  
TMEM39A  
TNFSF14  
TRAPPC1  
TRAPPC4  
TRPT1  
TSEN2  
TSGA14



Supplemental Table 2:

Experimental Mice used

Main-seq

| Background | Mouse number | Age at Sacrifice | Proteinuria | Gender |
|------------|--------------|------------------|-------------|--------|
| MRL/lpr    | 1            | 21 weeks         | 4           | F      |
| MRL/lpr    | 2            | 21 weeks         | 2.5         | F      |
| MRL/lpr    | 3            | 21 weeks         | 1           | F      |
| C57Bl/6    | 4            | 8 weeks          | 0           | F      |

MRL-TCRseq

| Background | Mouse number | Age at Sacrifice | Proteinuria | Gender | GN score | IN Score |
|------------|--------------|------------------|-------------|--------|----------|----------|
| MRL/lpr    | 1            | 20.5 weeks       | 4           | F      | 3.5      | 1.5      |
| MRL/lpr    | 2            | 21 weeks         | 2.5         | F      | 3        | 1.5      |
| MRL/lpr    | 3            | 21 weeks         | 1           | F      | 2        | 1        |
| MRL/lpr    | 4            | 25.5 weeks       | 4           | F      | 5        | 2.5      |
| MRL/lpr    | 5            | 25.5 weeks       | 4           | F      | 6        | 3        |

Yaa-TCRseq

| Background                      | Mouse number | Age at Sacrifice | Proteinuria | Gender | GN score | IN Score |
|---------------------------------|--------------|------------------|-------------|--------|----------|----------|
| <i>FcyR2b<sup>-/-</sup>.Yaa</i> | 1            | 23.5 weeks       | 4           | M      | 5        | 2        |
| <i>FcyR2b<sup>-/-</sup>.Yaa</i> | 2            | 24 weeks         | 4           | M      | 2        | 0.5      |
| <i>FcyR2b<sup>-/-</sup>.Yaa</i> | 3            | 23.5 weeks       | 2.5         | M      | 4        | 1        |
| <i>FcyR2b<sup>-/-</sup>.Yaa</i> | 4            | 23.5 weeks       | 3           | M      | 3        | 0.5      |
| <i>FcyR2b<sup>-/-</sup>.Yaa</i> | 5            | 23 weeks         | 2           | M      | 4        | 2        |
